# Supplementary material for: Analysis of Molecular Networks in the Cerebellum in Chronic Schizophrenia: Modulation by Early Postnatal Life Stressors in Murine Models
Source: MDPI journal article supplement (doi:10.3390/ijms221810076), 2021-09-17
Supplement: s1 [file s1]

**Table S1: Demographic, clinical and tissue-related features of cases.**

|                                     | Schizophrenia (n=12) | Control (n=14) | Statistic             | p- value |
|-------------------------------------|----------------------|----------------|-----------------------|----------|
| <b>Gender</b>                       |                      |                |                       |          |
| Male                                | 100% (n=12)          | 100% (n=14)    | N/A                   | N/A      |
| Age (years)                         | 72 ± 9               | 69 ± 11        | 78.5 <sup>a</sup>     | 0.56     |
| PMD (hours)                         | 5.48 ± 2.29          | 5.46 ± 1.81    | 0.02; 25 <sup>b</sup> | 0.98     |
| pH Cerebellum                       | 6.88 ± 0.49          | 6.61 ± 0.63    | 1.25; 25 <sup>b</sup> | 0.22     |
| <b>SZ diagnosis</b>                 |                      |                |                       |          |
| Chronic residual                    | 66.67% (n= 8)        |                |                       |          |
| chronic paranoid                    | 16.67% (n=2)         |                |                       |          |
| chronic disorganized                | 8.33% (n=1)          |                |                       |          |
| chronic catatonic                   | 8.33% (n= 1)         |                |                       |          |
| Age of onset of SZ (years)          | 22 ± 8               | N/A            | N/A                   | N/A      |
| Duration of illness                 | 50 ± 9               | N/A            | N/A                   | N/A      |
| <b>Toxicology</b>                   |                      |                |                       |          |
| Daily AP dose (mg/day) <sup>c</sup> | 609 ± 507.10         | N/A            | N/A                   | N/A      |
| First generation AP                 | 16.67% (n=2)         |                |                       |          |
| Second generation AP                | 58.33% (n=7)         |                |                       |          |
| First and Second generation AP      | 8.88% (n=1)          |                |                       |          |
| AP free                             | 16.67% (n=2)         |                |                       |          |

Mean ± standard deviation; PMD, postmortem delay; SZ, schizophrenia; AP, antipsychotics; N/A, not applicable.

<sup>a</sup> Mann-Whitney U for non-parametric variables.

<sup>b</sup> T-statistic and degree of freedom for parametric variables.

<sup>c</sup> Last daily chlorpromazine equivalent dose was calculated based on the electronic records of drugs prescriptions of the patients as described (Gardner et al., 2010).
