# Supplementary material for: Analysis of Molecular Networks in the Cerebellum in Chronic Schizophrenia: Modulation by Early Postnatal Life Stressors in Murine Models
Source: MDPI journal article supplement (doi:10.3390/ijms221810076), 2021-09-17
Supplement: s1 [file s1]

**Figure S2**

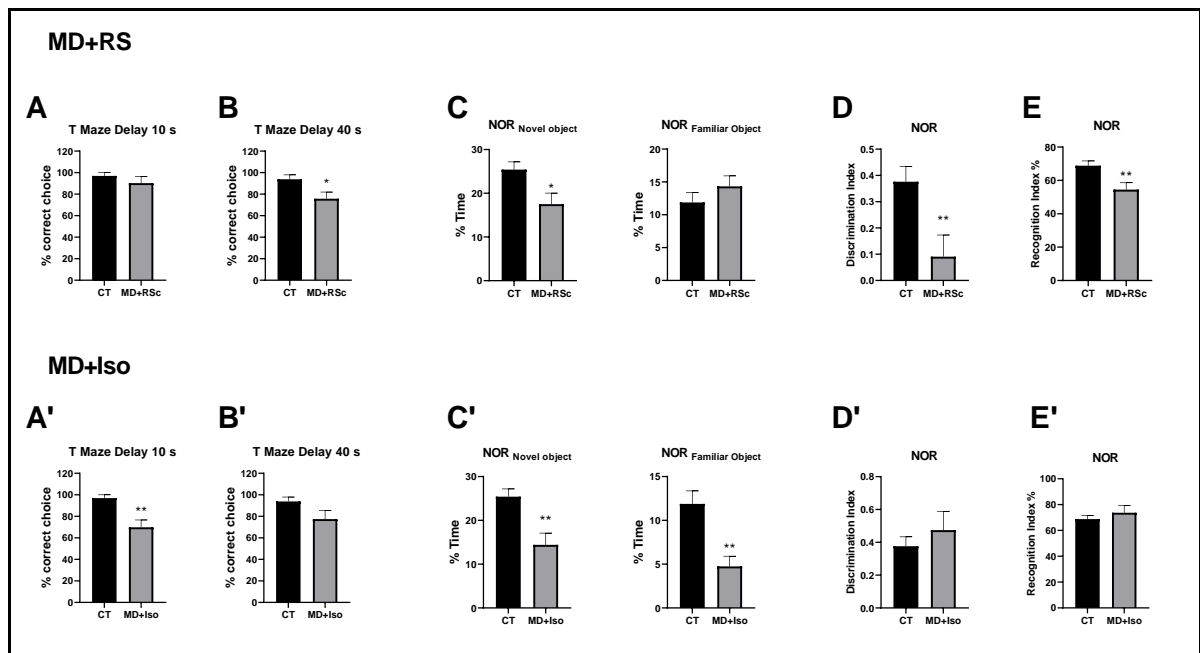

**Figure S2. Behavioral analyses of double-hit murine models for schizophrenia.**

Percentage of correct choices in alternation task T-maze test in rat tested at 10 (Figure A,A') and 40 (Figure B,B') s delay intervals. Percentage of time (s) exploring novel or familiar object (Figure C,C'), discrimination (Figure D,D') and recognition (Figure E,E') index in NOR test. Bars represent means  $\pm$  SEM. \* $p < 0.05$ , \*\* $p < 0.001$  vs control (CT) group. Statistical analysis was performed using the Student's t-test for samples with normal distribution, and the Mann-Whitney U test was carried out for non-parametric distribution.
