# Supplementary material for: Analysis of Molecular Networks in the Cerebellum in Chronic Schizophrenia: Modulation by Early Postnatal Life Stressors in Murine Models
Source: MDPI journal article supplement (doi:10.3390/ijms221810076), 2021-09-17
Supplement: s1 [file s1]

Figure S3

A. Axonal guidance (CLASP1, MW: 160 kDa; MW:  $\beta$ -actin 42 kDa)

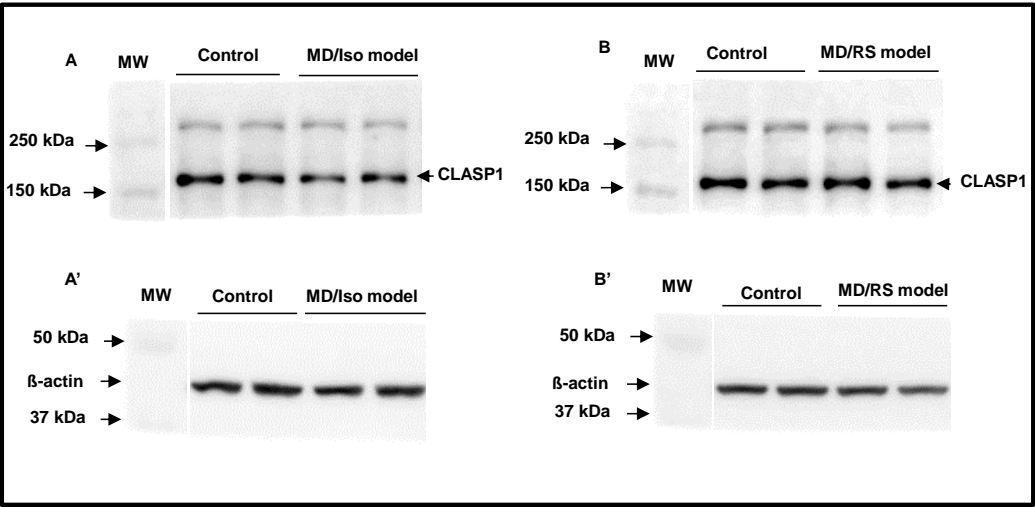

B. Vesicle-mediated transport (YWHAZ, MW: 28 kDa; MW:  $\beta$ -actin 42 kDa)

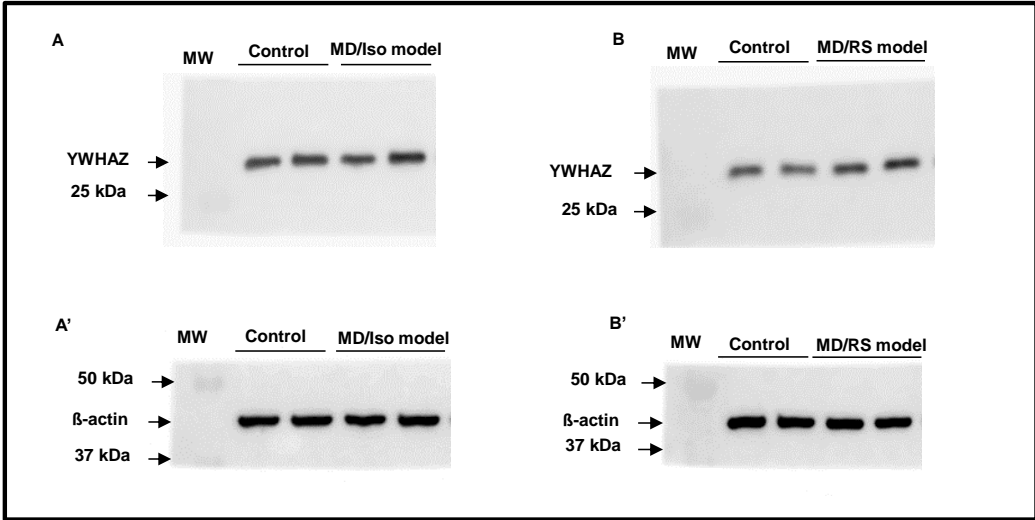

Continuation of Figure S3

C. TCA-Respiratory electron transport (NDUFB9, MW: 22 kDa; MW:  $\beta$ -actin 42 kDa)

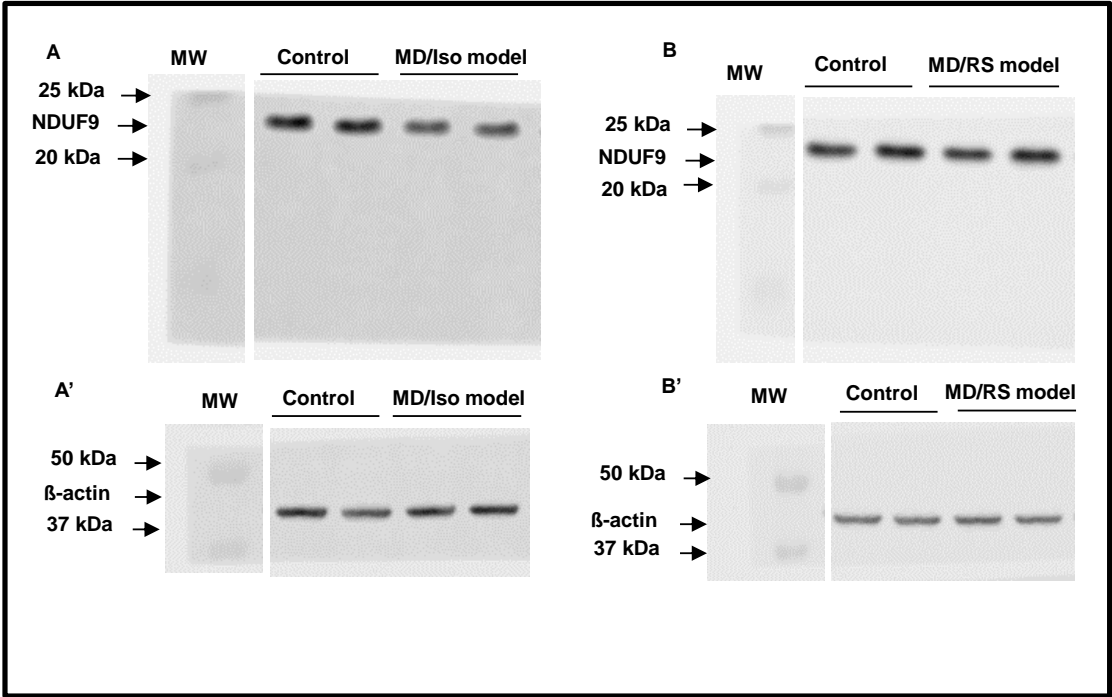

D. Neutrophil degranulation (METTL7A, MW: 28 kDa; MW:  $\beta$ -actin 42 kDa)

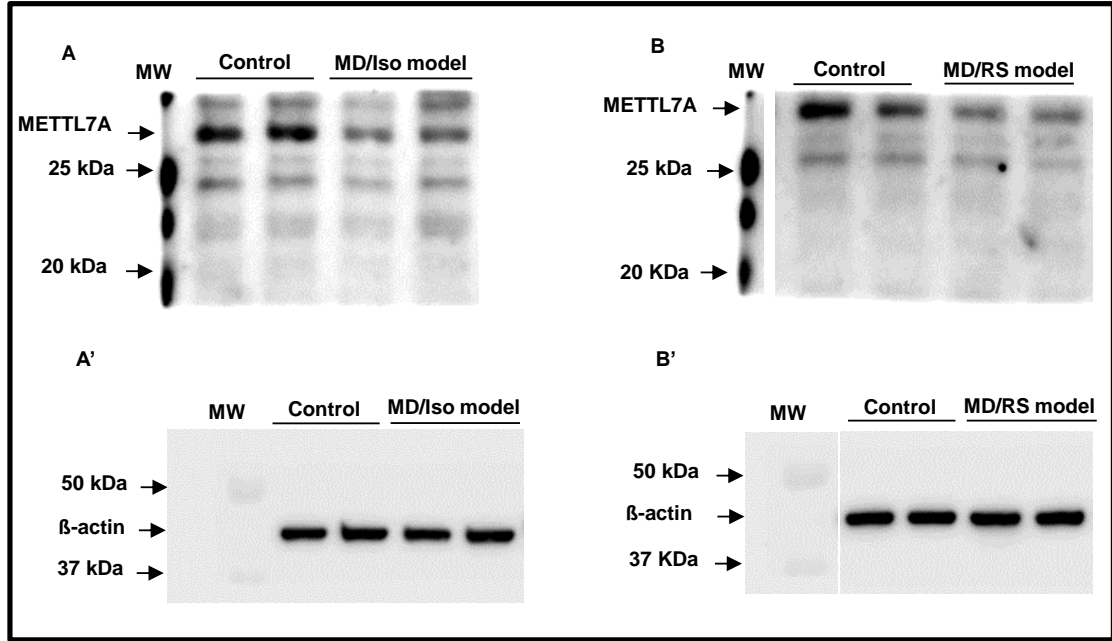

**Figure S3. Validation of hit proteins in two double-hit murine models for schizophrenia.** The hit proteins of the enriched pathways in our proteomic study were

analysed in two double-hit murine models for SZ. **Panel A.** Immunoblot of CLASP1, a hit protein from axon guidance. **A.** Expression of CLASP1 in the MD/Iso model in which it was significantly decreased in comparison with the control. **B.** Expression of CLASP1 in the MD/RS model; no significant changes were observed in this model. **A'** and **B'** show  $\beta$ -actin expression used as a loading control. **Panel B.** Immunodetection of YWHAZ a hit protein from vesicle-mediated transport. In this analysis we did not observe any change in YWHAZ expression either in the MD/Iso or the MD/RS model in comparison with controls. **Panel C.** Immunoblot of NDUFB9, a hit protein from TCA/Respiratory electron transport. **A.** Reduced expression of NDUFB9 in the MD/Iso model in comparison with controls. **B.** Expression of NDUFB9 in the MD/RS model and controls. No significant changes were found in this model. **A'** and **B'** show  $\beta$ -actin expression used as a loading control. **Panel D.** Immunoblot of METTL7A, a hit protein from neutrophil degranulation. **A.** Immunodetection of METTL7A in the MD/Iso model in which it was significantly downregulated in comparison with the control. **B.** Expression of METTL7A in the MD/RS model in which it was also significantly downregulated with respect to the control. **A'** and **B'** show  $\beta$ -actin expression used as a loading control for METTL7A. **A'** and **B'** show  $\beta$ -Actin expression used as a loading control. MD/Iso: maternal deprivation and isolation model. MD/RS: Maternal deprivation and restraint stress model. MW: Molecular weight. All protein levels were normalized to  $\beta$ -actin values.
