# Supplementary material for: Analysis of Molecular Networks in the Cerebellum in Chronic Schizophrenia: Modulation by Early Postnatal Life Stressors in Murine Models
Source: MDPI journal article supplement (doi:10.3390/ijms221810076), 2021-09-17
Supplement: s1 [file s1]

Figure S1

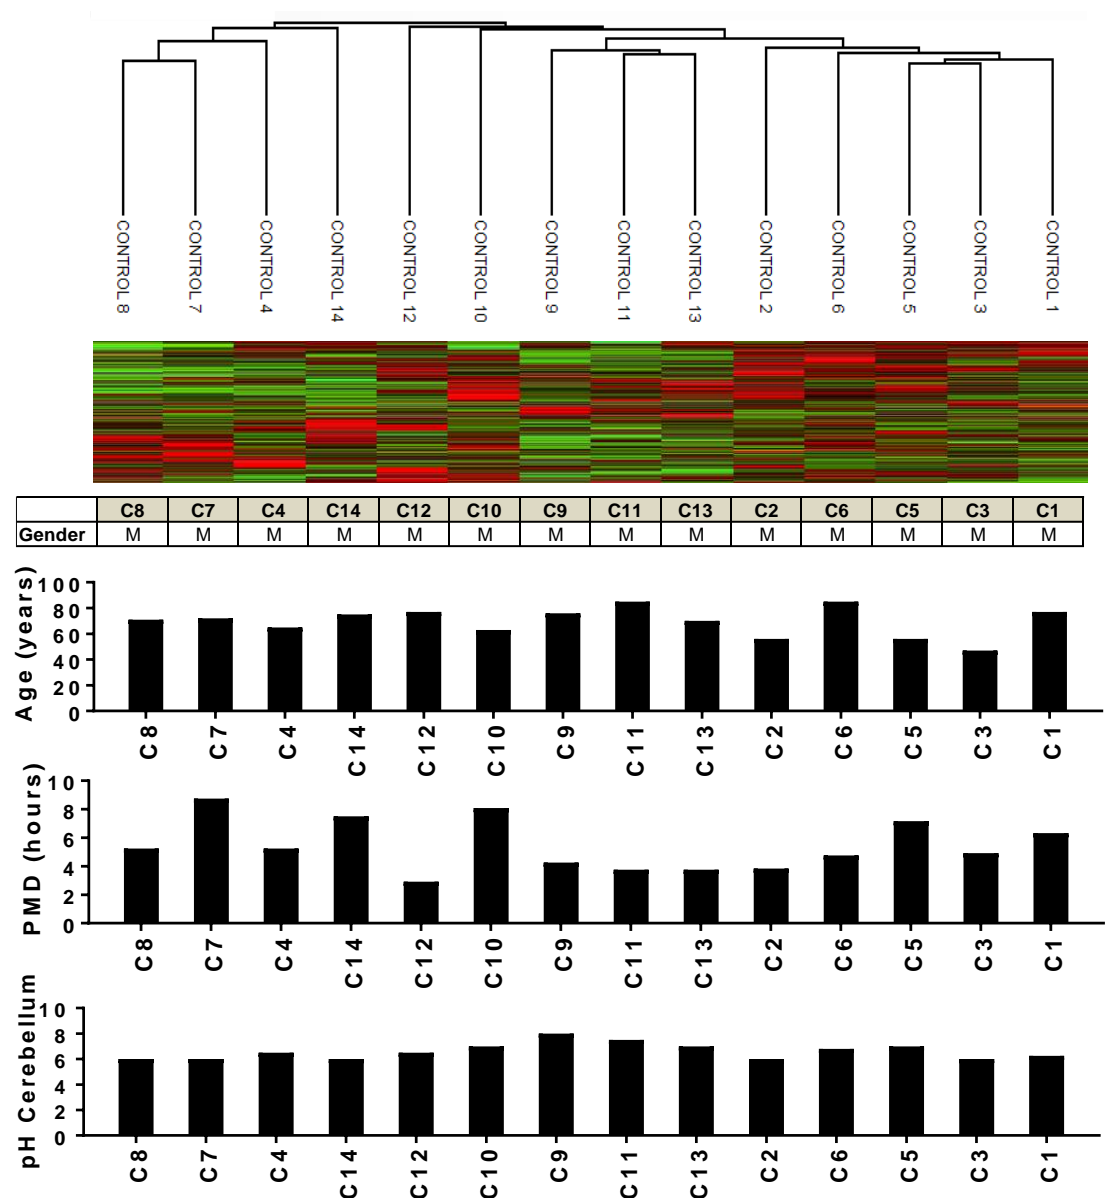

**Figure S1:** Unsupervised hierarchical clustering analysis for quantified proteins from *postmortem* cerebellum of 14 healthy control samples. The table below it shows the gender. The graphs show the tissue-related features of each healthy control sample. M: Male, PMD: *Postmortem* time delay.
