# Supplementary material for: Analysis of Molecular Networks in the Cerebellum in Chronic Schizophrenia: Modulation by Early Postnatal Life Stressors in Murine Models
Source: MDPI journal article supplement (doi:10.3390/ijms221810076), 2021-09-17
Supplement: s1 [file s1]

**Table S2:** Proteins previously reported in proteomic studies in schizophrenia

| Cerebral area                   | Proteins previously reported in schizophrenia                                                                                                                                                                                                                                                        | References                                                                                                                                                                                                                                                                                                                                         |
|---------------------------------|------------------------------------------------------------------------------------------------------------------------------------------------------------------------------------------------------------------------------------------------------------------------------------------------------|----------------------------------------------------------------------------------------------------------------------------------------------------------------------------------------------------------------------------------------------------------------------------------------------------------------------------------------------------|
| Cerebellum                      | CAMK4; C11orf58; NDUFA12; AHCY; ERP44; PAFAH1B1; PRDX6; NCKAP1; LCP1; MYH9; NAXE; ACLY; CYB5R1; NAPA; CCT7; HSD17B4; BCL2L13; RAB21; RIMS1; UBE2I                                                                                                                                                    | Vidal-Domènech et al., 2020; Reis-de-Oliveira et al., 2020                                                                                                                                                                                                                                                                                         |
| Anterior cingulate              | CS; GPD1; AHCY; CBR1; UCHL1; PGAM1                                                                                                                                                                                                                                                                   | Clark et al., 2007                                                                                                                                                                                                                                                                                                                                 |
| Anterior cingulate cortex       | CS; ACAT2; SOD1;DDAH1;DCTN2; IDH2; HNRNPK; IARS; METTL7A; ACTR2; PPIA; LIN7A; PIP4K2A; NAPA; SPTAN1; SCR1; TPM1; ARHGDI; YWHAZ; YWHAB; COMT; HSD17B4; AP2M1; UCHL1                                                                                                                                   | Clark et al., 2007; Clark et al., 2006; Föcking et al., 2015; Martins de Souza et al., 2010; Smalla et al., 2008; English et al., 2011                                                                                                                                                                                                             |
| Anterior hippocampus            | UCHL1 ; DDAH1 ; SOD1 ; CAPZA2 ; YWHAZ; YWHAB ;PRDX6                                                                                                                                                                                                                                                  | Nesvaderani et al., 2009                                                                                                                                                                                                                                                                                                                           |
| Posterior hippocampus           | PGAM1                                                                                                                                                                                                                                                                                                | Nesvaderani et al., 2009                                                                                                                                                                                                                                                                                                                           |
| Anterior temporal lobe          | YWHAZ; YWHAB; HSPD1; NDUFB5; SPTAN1; YWHAH; YWHAZ; MYH9; PURA; HNRNPK; MOG                                                                                                                                                                                                                           | Saia-Cereida et al., 2017; Martins de Souza et al., 2009 <sup>b</sup>                                                                                                                                                                                                                                                                              |
| Auditory cortex                 | GNAQ; ATP1A3; UCHL1                                                                                                                                                                                                                                                                                  | Mc Donald et al., 2015                                                                                                                                                                                                                                                                                                                             |
| Corpus callosum                 | YWHAZ; UCHL1; MOG; NPM1; DDAH1; YWHAZ; YWHAB; ANK3; SOD1; DDT; HP1BP3; HNRNPR; YWHAH                                                                                                                                                                                                                 | English et al., 2011; Saia-Cereida et al., 2015; Sivagnanasundaram et al., 2007; Saia-Cereida et al., 2016                                                                                                                                                                                                                                         |
| Dorsolateral prefrontal cortex  | DPYSL5; NDUFS1; HSPD1; SPTAN1; YWHAZ; PGAM2; MOG; RAP2A; NDUFA12; GDAP1; NDUFB10; SIRPA; HP1BP3; DPYSL4; ADH5; GSTM3; IGSF8; CLSTN1; MAP6; PRDX6; TKT; ERP29; PGAM1; PURA; YWHAZ; CBR1; TCP1; HSPA9; BCL2L13; UCHL1; ARPC1A; ITGAV; SCR1; GPM6A; MARCKS; TXN2; TPT1; CYB5A; RTN1; GNAQ; ATP5PD; PPA2 | Saia-Cereida et al., 2015; Martins de Souza et al., 2009 <sup>a</sup> ; English et al., 2009; Martins de Souza et al., 2009 <sup>c</sup> ; Chan et al., 2011; Behan et al., 2009; Pinacho et al., 2016; Pennington et al., 2008; English et al., 2011; Wesseling et al., 2013; Novikova et al., 2006; Smalla et al., 2008; Prabakaran et al., 2004 |
| Hippocampus                     | TPPP; UBE2M; YWHAZ;SOD1; PRDX6; TCP1; UCHL1                                                                                                                                                                                                                                                          | Schubert et al., 2015; Föcking et al., 2011                                                                                                                                                                                                                                                                                                        |
| Mediodorsal thalamus            | YWHAZ; CBR1; SYN3; PGAM1; NDUFB9; TKT; MOG; HSPD1; PPIA; PITPNA                                                                                                                                                                                                                                      | Martins de Souza et al., 2010                                                                                                                                                                                                                                                                                                                      |
| Orbitofrontal prefrontal cortex | RAB35; ATP2B3; PGAM1; RTN1; DDAH1; ATP1A1; MARCKS; MOG; YWHAH; SYN3; GPM6A; ATP1A3                                                                                                                                                                                                                   | Velasquez et al., 2017                                                                                                                                                                                                                                                                                                                             |
| Wernicke's area                 | DLD; PRDX6; PGAM1; NDUFS1                                                                                                                                                                                                                                                                            | Martins de Souza et al., 2009 <sup>d</sup>                                                                                                                                                                                                                                                                                                         |
| Insular cortex                  | SNCG; ERLIN2; NPM1; COPS4                                                                                                                                                                                                                                                                            | Pennington et al., 2008                                                                                                                                                                                                                                                                                                                            |
